# Supplementary material
Source: PubMed Central journal article supplement (PMC8237236)
Supplement: NIHMS1707998-supplement-Supplemental_Information.pdf [file NIHMS1707998-supplement-Supplemental_Information.pdf]

## Supplemental Information

**SUPPLEMENTAL TABLE 2** Unadjusted Associations Among Demographics, Markers of Nonstandard Care, and Care Practices With PRD<sub>IP</sub> for Pediatric Asthma

|                              | <i>N</i> | PRD <sub>IP</sub> , h | LCI   | UCI   | <i>P</i> |
|------------------------------|----------|-----------------------|-------|-------|----------|
| Demographics, baseline       |          |                       |       |       |          |
| Age, y                       |          |                       |       |       |          |
| 2–4                          | 394      | 20.53                 | 13.81 | 30.52 | .0082    |
| 5–12                         | 510      | 21.39                 | 14.41 | 31.76 |          |
| 13–17                        | 101      | 26.08                 | 17.26 | 39.40 |          |
| Sex                          |          |                       |       |       |          |
| Male                         | 607      | 20.86                 | 14.02 | 31.03 | .0998    |
| Female                       | 398      | 22.46                 | 15.07 | 33.47 |          |
| Race                         |          |                       |       |       |          |
| White                        | 322      | 20.66                 | 13.92 | 30.65 | .3915    |
| African American             | 450      | 21.86                 | 14.75 | 32.39 |          |
| Other                        | 130      | 22.54                 | 15.03 | 33.80 |          |
| Insurance                    |          |                       |       |       |          |
| Public                       | 751      | 21.97                 | 14.84 | 32.51 | .1328    |
| Private                      | 254      | 20.36                 | 13.68 | 30.30 |          |
| Baseline impairment, risk    |          |                       |       |       |          |
| Intermittent, mild-low risk  | 330      | 20.71                 | 13.85 | 30.97 | .2201    |
| Moderate, severe-low risk    | 189      | 22.86                 | 15.21 | 34.34 |          |
| Moderate, severe-high risk   | 239      | 22.31                 | 14.88 | 33.43 |          |
| Intermittent, mild-high risk | 170      | 20.21                 | 13.43 | 30.42 |          |
| Markers of nonstandard care  |          |                       |       |       |          |
| Steroids route               |          |                       |       |       |          |
| Oral only                    | 631      | 17.64                 | 12.59 | 24.71 | <.0001   |
| Injected only                | 21       | 33.46                 | 21.82 | 51.31 |          |
| Oral and injected            | 273      | 34.97                 | 24.83 | 49.24 |          |
| None                         | 80       | 18.72                 | 13.04 | 26.88 |          |
| Prednisone/prednisolone      |          |                       |       |       |          |
| Yes                          | 932      | 21.89                 | 14.77 | 32.44 | .0059    |
| No                           | 73       | 17.33                 | 11.36 | 26.44 |          |
| Ipratropium                  |          |                       |       |       |          |
| Yes                          | 326      | 34.97                 | 25.44 | 48.09 | <.0001   |
| No                           | 679      | 17.07                 | 12.51 | 23.30 |          |
| Ever in ICU                  |          |                       |       |       |          |
| Yes                          | 304      | 34.21                 | 24.43 | 47.90 | <.0001   |
| No                           | 701      | 17.77                 | 12.75 | 24.77 |          |
| Chest radiograph             |          |                       |       |       |          |
| Yes                          | 217      | 31.37                 | 21.64 | 45.49 | <.0001   |
| No                           | 788      | 19.19                 | 13.34 | 27.60 |          |
| Continuous albuterol         |          |                       |       |       |          |
| Yes                          | 309      | 33.65                 | 23.53 | 48.13 | <.0001   |
| No                           | 696      | 17.95                 | 12.61 | 25.56 |          |

**SUPPLEMENTAL TABLE 2** Continued

|                                            | <i>N</i> | PRD <sub>IP</sub> , h | LCI   | UCI   | <i>P</i> |
|--------------------------------------------|----------|-----------------------|-------|-------|----------|
| <b>Antibiotics</b>                         |          |                       |       |       |          |
| None                                       | 787      | 19.70                 | 13.62 | 28.49 | <.0001   |
| Azithromycin                               | 137      | 31.01                 | 21.13 | 45.51 |          |
| Other antibiotic                           | 81       | 23.75                 | 16.02 | 35.22 |          |
| <b>Care practices at last site of care</b> |          |                       |       |       |          |
| <b>Overseeing physician</b>                |          |                       |       |       |          |
| Specialist only                            | 203      | 25.69                 | 17.58 | 37.54 | <.0001   |
| Generalist only                            | 458      | 18.21                 | 12.56 | 26.42 |          |
| Specialist and generalist                  | 318      | 25.00                 | 17.08 | 36.61 |          |
| Other                                      | 26       | 21.46                 | 13.61 | 33.83 |          |
| <b>Pulse oximetry</b>                      |          |                       |       |       |          |
| Spot check only                            | 316      | 16.04                 | 11.38 | 22.60 | <.0001   |
| None                                       | 4        | 9.93                  | 4.77  | 20.65 |          |
| Continuous and spot check                  | 384      | 29.66                 | 21.01 | 41.87 |          |
| Continuous only                            | 301      | 25.34                 | 17.90 | 35.85 |          |
| <b>Performer of weaning assessments</b>    |          |                       |       |       |          |
| RT only                                    | 165      | 18.80                 | 11.97 | 29.51 | .0147    |
| Discharged from ICU                        | 28       | 16.42                 | 10.35 | 26.06 |          |
| Nurse only                                 | 101      | 20.78                 | 13.78 | 31.34 |          |
| Multiple providers                         | 711      | 23.76                 | 16.16 | 34.92 |          |

LCI, lower confidence interval; RT, respiratory therapist; UCI, upper confidence interval.

**SUPPLEMENTAL TABLE 3** Unadjusted Associations Between ED Practices and Timing of Markers of Nonstandard Care With PRD<sub>TOT</sub> for Pediatric Asthma

|                             | <i>N</i> | PRD <sub>TOT</sub> , h | LCI   | UCI   | <i>P</i> |
|-----------------------------|----------|------------------------|-------|-------|----------|
| ED practices                |          |                        |       |       |          |
| ED dexamethasone            |          |                        |       |       |          |
| Yes                         | 92       | 18.65                  | 12.14 | 28.66 | <.0001   |
| No                          | 775      | 27.93                  | 18.89 | 41.31 |          |
| ED magnesium                |          |                        |       |       |          |
| Yes                         | 236      | 36.44                  | 26.27 | 50.56 | <.0001   |
| No                          | 631      | 24.30                  | 17.62 | 33.52 |          |
| Markers of nonstandard care |          |                        |       |       |          |
| Injected steroids           |          |                        |       |       |          |
| None                        | 554      | 21.99                  | 16.52 | 29.28 | <.0001   |
| ED only                     | 49       | 25.68                  | 18.75 | 35.18 |          |
| IP only                     | 156      | 38.57                  | 28.74 | 51.77 |          |
| ED and IP                   | 108      | 40.85                  | 30.32 | 55.04 |          |
| Chest radiograph            |          |                        |       |       |          |
| None                        | 302      | 21.76                  | 15.75 | 30.05 | <.0001   |
| ED only                     | 415      | 25.91                  | 18.8  | 35.72 |          |
| IP only                     | 95       | 33.38                  | 23.90 | 46.61 |          |
| ED and IP                   | 55       | 44.90                  | 31.80 | 63.39 |          |
| Antibiotics                 |          |                        |       |       |          |
| None                        | 680      | 24.64                  | 17.83 | 34.04 | <.0001   |
| ED only                     | 14       | 23.17                  | 15.1  | 35.55 |          |
| IP only                     | 126      | 35.71                  | 25.58 | 49.84 |          |
| ED and IP                   | 46       | 28.05                  | 19.65 | 40.03 |          |

LCI, lower confidence interval; UCI, upper confidence interval.
